# Supplementary material
Source: PubMed Central journal article supplement (PMC2803686)
Supplement: NIHMS157134-supplement-supplement_1.pdf [file NIHMS157134-supplement-supplement_1.pdf]

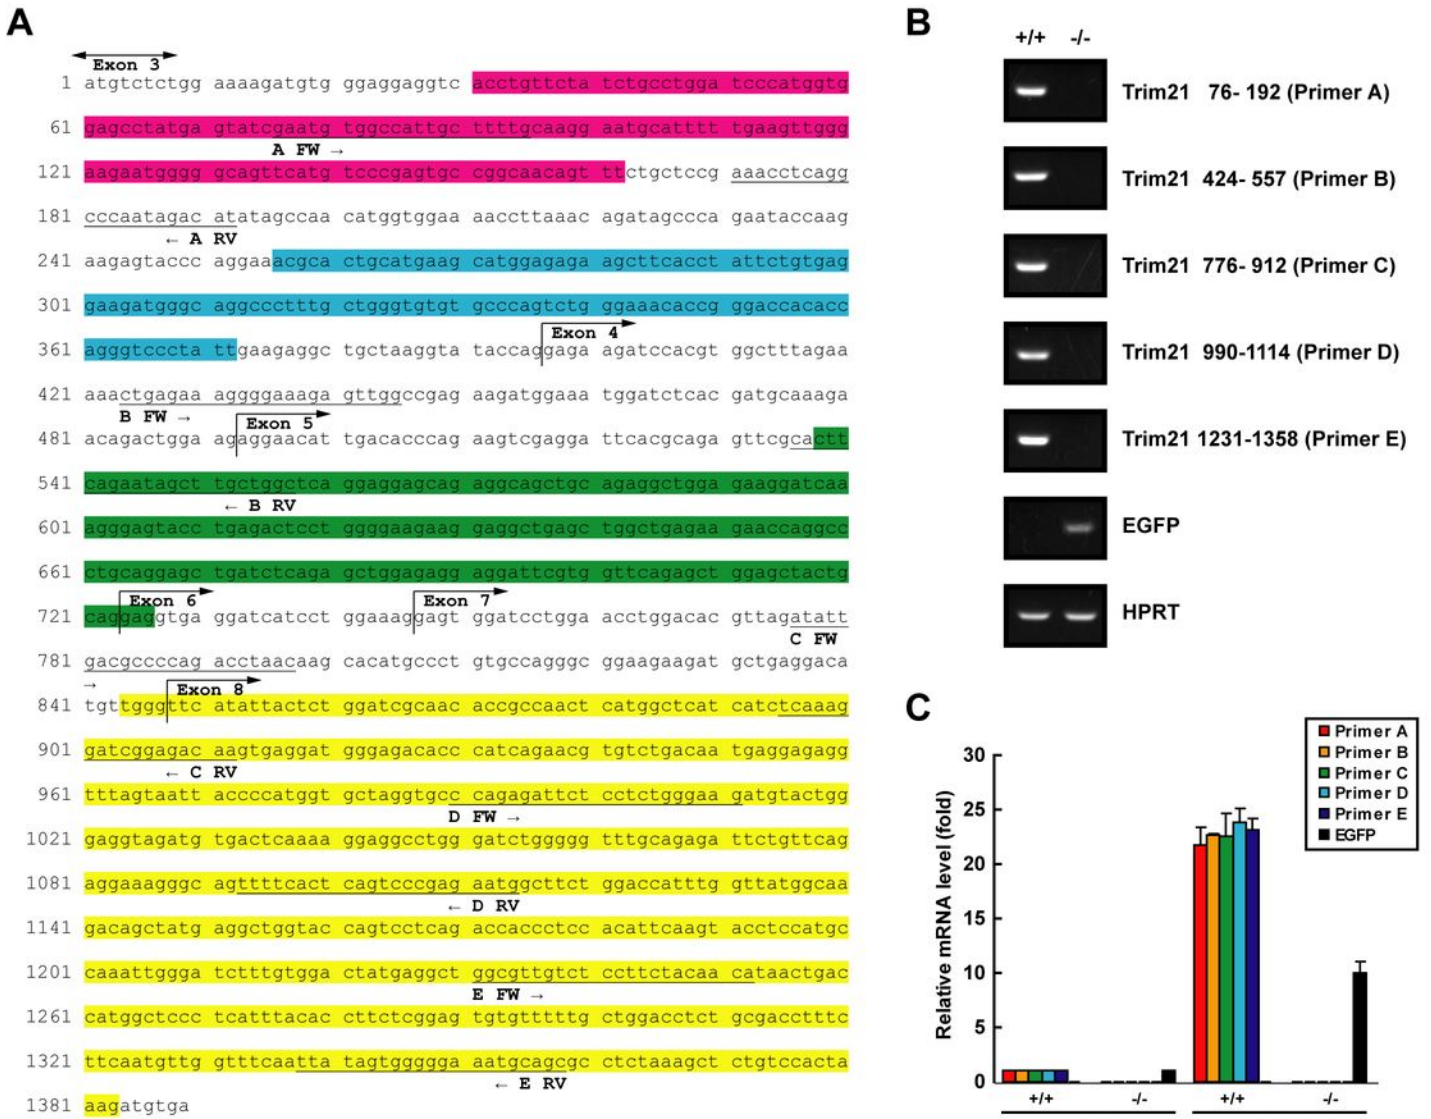

**SUPPLEMENTAL FIGURE 1.** The absence of Trim21 transcripts in *Trim21*<sup>-/-</sup> cells. *A*, Mouse Trim21 mRNA sequence (NM\_009277.3) from start to stop codon. Conserved domains are highlighted with pink (RING), blue (B-box), green (coiled-coil) and yellow color (PRY/SPRY). Positions of individual exons are marked. Primers used in *B* and *C* are indicated as underlined sequences. *B*, IFN- $\gamma$ -primed *Trim21*<sup>+/+</sup> and *Trim21*<sup>-/-</sup> BMMs were stimulated with poly(I:C) for 12 h, and expression of Trim21 transcripts corresponding to indicated primer sets was detected by RT-PCR. Expression of EGFP and hypoxanthine phosphoribosyltransferase (HPRT) was tested as controls. *C*, IFN- $\gamma$ -primed *Trim21*<sup>+/+</sup> and *Trim21*<sup>-/-</sup> BMMs were stimulated with poly(I:C) for 12 h and levels of Trim21 transcripts detected by indicated primer sets and EGFP transcript were quantified by qPCR.

A

EF with IFN- $\beta$ 

| gene     | +/+ |       |      | -/-  |       |      | ratio |      |      |
|----------|-----|-------|------|------|-------|------|-------|------|------|
|          | 0h  | 6h    | 24h  | 0h   | 6h    | 24h  | 0h    | 6h   | 24h  |
| Adar     | 1.0 | 4.1   | 2.6  | 1.2  | 4.1   | 2.5  | 1.2   | 1.0  | -1.0 |
| B2m      | 1.0 | 1.6   | 2.8  | 1.1  | 1.7   | 2.4  | 1.1   | 1.1  | -1.1 |
| Bst2     | 1.0 | 2.3   | 2.9  | 1.1  | 2.1   | 2.6  | 1.1   | -1.1 | -1.1 |
| Casp1    | 1.0 | 3.1   | 1.0  | 1.5  | 3.5   | 1.2  | 1.5   | 1.1  | 1.2  |
| Cxcl10   | 1.0 | 212.7 | -1.5 | -1.1 | 234.6 | -2.0 | -1.1  | 1.1  | -1.3 |
| Eif2ak2  | 1.0 | 3.9   | 2.1  | 1.4  | 4.4   | 2.5  | 1.4   | 1.1  | 1.2  |
| Gbp1     | 1.0 | 25.1  | 2.2  | -1.3 | 19.2  | 1.4  | -1.3  | -1.3 | -1.5 |
| Gbp2     | 1.0 | 32.9  | 2.4  | 1.7  | 56.6  | 2.8  | 1.7   | 1.7  | 1.2  |
| H2-D1    | 1.0 | 2.6   | 3.8  | 1.0  | 2.4   | 3.7  | 1.0   | -1.1 | -1.0 |
| H2-K1    | 1.0 | 2.7   | 5.4  | 1.1  | 2.8   | 4.6  | 1.1   | 1.0  | -1.2 |
| H2-M3    | 1.0 | 4.1   | 2.3  | 1.2  | 4.4   | 2.3  | 1.2   | 1.1  | -1.0 |
| H2-Q1    | 1.0 | 5.5   | 22.3 | 1.6  | 6.4   | 17.5 | 1.6   | 1.2  | -1.3 |
| H2-Q7    | 1.0 | 2.7   | 5.1  | 1.2  | 2.7   | 4.3  | 1.2   | 1.0  | -1.2 |
| H2-T10   | 1.0 | 8.3   | 4.1  | 1.2  | 7.9   | 3.5  | 1.2   | -1.0 | -1.2 |
| Ifi204   | 1.0 | 12.8  | 2.5  | 1.8  | 14.8  | 2.9  | 1.8   | 1.1  | 1.2  |
| Ifit1    | 1.0 | 12.8  | 4.1  | 1.5  | 12.5  | 3.7  | 1.5   | -1.0 | -1.1 |
| Ifit3    | 1.0 | 38.9  | 5.1  | 1.4  | 34.9  | 4.7  | 1.4   | -1.1 | -1.1 |
| Ifna4    | 1.0 | -1.5  | 2.7  | -1.1 | -1.2  | 2.7  | -1.1  | 1.2  | 1.0  |
| Irf1     | 1.0 | 4.0   | 1.5  | -1.3 | 3.1   | 1.3  | -1.3  | -1.3 | -1.1 |
| Irf5     | 1.0 | 2.9   | 1.2  | 1.8  | 3.2   | 1.4  | 1.8   | 1.1  | 1.2  |
| Irf7     | 1.0 | 10.0  | 10.5 | 1.4  | 9.9   | 9.6  | 1.4   | -1.0 | -1.1 |
| Isg15    | 1.0 | 6.5   | 3.4  | 1.3  | 6.5   | 3.2  | 1.3   | 1.0  | -1.1 |
| Isg20    | 1.0 | 5.7   | 1.4  | 1.0  | 5.7   | 1.3  | 1.0   | -1.0 | -1.1 |
| Irf9     | 1.0 | 2.3   | 2.3  | -1.0 | 2.1   | 2.2  | -1.0  | -1.1 | -1.0 |
| Mx1      | 1.0 | 277.8 | 14.0 | 1.6  | 231.4 | 10.5 | 1.6   | -1.2 | -1.3 |
| Mx2      | 1.0 | 30.4  | 6.2  | 1.4  | 23.9  | 5.7  | 1.4   | -1.3 | -1.1 |
| Myd88    | 1.0 | 2.7   | 1.0  | 1.1  | 2.4   | 1.1  | 1.1   | -1.1 | 1.1  |
| Nmi      | 1.0 | 7.9   | 2.4  | -1.1 | 6.1   | 2.0  | -1.1  | -1.3 | -1.2 |
| Oas1a    | 1.0 | 17.8  | 5.5  | 1.5  | 17.7  | 5.8  | 1.5   | -1.0 | 1.0  |
| Oas1b    | 1.0 | 14.4  | 5.2  | 1.2  | 12.9  | 4.7  | 1.2   | -1.1 | -1.1 |
| Oas2     | 1.0 | 22.5  | 14.0 | 1.9  | 20.7  | 13.4 | 1.9   | -1.1 | -1.0 |
| Pml      | 1.0 | 6.5   | 2.6  | 1.4  | 6.7   | 2.7  | 1.4   | 1.0  | 1.0  |
| Psme2    | 1.0 | 2.7   | 1.5  | 1.0  | 2.7   | 1.4  | 1.0   | -1.0 | -1.1 |
| Stat1    | 1.0 | 6.0   | 2.9  | 1.2  | 5.8   | 2.4  | 1.2   | -1.0 | -1.2 |
| Stat2    | 1.0 | 9.7   | 3.7  | -1.1 | 8.1   | 3.9  | -1.1  | -1.2 | 1.1  |
| Tap1     | 1.0 | 7.9   | 3.1  | 1.2  | 7.5   | 3.1  | 1.2   | -1.0 | -1.0 |
| Ifnar1   | 1.0 | -1.0  | 1.0  | 1.0  | -1.0  | -1.0 | 1.0   | 1.0  | -1.1 |
| Ifnar2   | 1.0 | -1.0  | 1.5  | 1.0  | 1.0   | 1.3  | 1.0   | 1.1  | -1.1 |
| Gusb     | 1.0 | -1.1  | -1.1 | -1.1 | -1.1  | -1.3 | -1.1  | -1.0 | -1.2 |
| Hprt1    | 1.0 | -1.1  | -1.0 | 1.1  | -1.2  | 1.0  | 1.1   | -1.0 | 1.1  |
| Hsp90ab1 | 1.0 | 1.1   | -1.0 | -1.1 | -1.0  | -1.0 | -1.1  | -1.2 | -1.0 |
| Gapdh    | 1.0 | -1.1  | 1.2  | 1.1  | 1.1   | 1.2  | 1.1   | 1.1  | 1.0  |
| Actb     | 1.0 | 1.1   | -1.0 | 1.0  | 1.3   | 1.0  | 1.0   | 1.1  | 1.1  |

B

BMM with IFN- $\gamma$ 

| gene     | +/+ |       |       | -/-  |       |       | ratio |      |      |
|----------|-----|-------|-------|------|-------|-------|-------|------|------|
|          | 0h  | 6h    | 24h   | 0h   | 6h    | 24h   | 0h    | 6h   | 24h  |
| Cxcl10   | 1.0 | 375.3 | 100.7 | -1.1 | 341.1 | 105.4 | -1.1  | -1.1 | 1.0  |
| F3       | 1.0 | 10.6  | -1.1  | -1.4 | 8.4   | 1.0   | -1.4  | -1.3 | 1.1  |
| Isg15    | 1.0 | 6.1   | 3.8   | 1.2  | 6.7   | 3.8   | 1.2   | 1.1  | -1.0 |
| Ifi204   | 1.0 | 4.0   | 3.1   | 1.2  | 4.0   | 3.3   | 1.2   | 1.0  | 1.1  |
| Ifi35    | 1.0 | 2.4   | 1.9   | 1.1  | 2.5   | 2.1   | 1.1   | 1.0  | 1.1  |
| Ifi44    | 1.0 | 5.8   | 8.9   | 1.1  | 5.4   | 8.1   | 1.1   | -1.1 | -1.1 |
| Ifih1    | 1.0 | 5.2   | 3.8   | 1.1  | 3.8   | 3.9   | 1.1   | -1.4 | 1.0  |
| Ifit1    | 1.0 | 3.9   | 3.6   | 1.2  | 3.6   | 3.4   | 1.2   | -1.1 | -1.0 |
| Ifit2    | 1.0 | 9.9   | 6.8   | 1.4  | 9.4   | 6.6   | 1.4   | -1.1 | -1.0 |
| Ifit3    | 1.0 | 2.2   | 2.4   | 1.2  | 2.2   | 2.2   | 1.2   | 1.0  | -1.1 |
| Ifitm1   | 1.0 | 12.2  | 1.1   | -1.5 | 9.2   | -1.0  | -1.5  | -1.3 | -1.1 |
| Ifnb1    | 1.0 | 21.3  | 2.4   | -1.3 | 14.8  | 2.8   | -1.3  | -1.4 | 1.2  |
| Il12rb1  | 1.0 | 6.6   | 49.7  | -1.5 | 6.7   | 54.2  | -1.5  | 1.0  | 1.1  |
| Il12rb2  | 1.0 | 5.9   | 6.7   | -1.0 | 4.9   | 7.2   | -1.0  | -1.2 | 1.1  |
| Il13ra1  | 1.0 | 2.7   | 1.6   | 1.1  | 3.3   | 1.5   | 1.1   | 1.2  | -1.0 |
| Il21r    | 1.0 | 1.0   | 2.0   | 1.0  | -1.2  | 2.0   | 1.0   | -1.2 | -1.0 |
| Il2rg    | 1.0 | 2.3   | 5.0   | 1.1  | 2.2   | 5.1   | 1.1   | -1.0 | 1.0  |
| Il4ra    | 1.0 | 3.0   | 2.5   | -1.0 | 2.6   | 2.5   | -1.0  | -1.2 | -1.0 |
| Irf1     | 1.0 | 20.0  | 13.4  | 1.0  | 18.4  | 13.2  | 1.0   | -1.1 | -1.0 |
| Irf7     | 1.0 | 1.6   | 2.9   | 1.1  | 1.8   | 2.7   | 1.1   | 1.1  | -1.1 |
| Irf8     | 1.0 | 7.1   | 4.0   | -1.0 | 6.9   | 4.2   | -1.0  | -1.0 | 1.0  |
| Irgm     | 1.0 | 11.3  | 8.2   | 1.1  | 10.5  | 7.6   | 1.1   | -1.1 | -1.1 |
| Mx1      | 1.0 | 9.2   | 8.3   | 1.1  | 7.0   | 7.9   | 1.1   | -1.3 | -1.0 |
| Ifngr1   | 1.0 | -2.3  | -1.5  | -1.1 | -2.4  | -1.4  | -1.1  | -1.0 | 1.1  |
| Ifngr2   | 1.0 | -1.3  | -1.2  | -1.1 | -1.3  | -1.2  | -1.1  | -1.0 | -1.0 |
| Gusb     | 1.0 | -1.8  | -1.9  | 1.1  | -1.7  | -2.0  | 1.1   | 1.0  | -1.1 |
| Hprt1    | 1.0 | 2.0   | 1.7   | -1.1 | 2.0   | 1.7   | -1.1  | -1.0 | 1.0  |
| Hsp90ab1 | 1.0 | -1.1  | 1.0   | -1.0 | -1.0  | 1.0   | -1.0  | 1.1  | 1.0  |
| Gapdh    | 1.0 | -1.2  | 1.3   | 1.0  | -1.2  | 1.4   | 1.0   | 1.0  | 1.1  |
| Actb     | 1.0 | 1.1   | -1.2  | 1.1  | 1.0   | -1.2  | 1.1   | -1.1 | -1.0 |

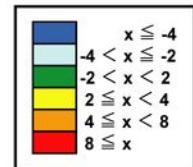

**SUPPLEMENTAL FIGURE 2.** IFN-inducible gene induction in *Trim21*<sup>+/+</sup> and *Trim21*<sup>-/-</sup> cells stimulated with IFN. *A*, *Trim21*<sup>+/+</sup> and *Trim21*<sup>-/-</sup> EFs were stimulated with IFN- $\beta$ , and mRNA of type I IFN-inducible genes was quantified by PCR Array. Data shows the fold as compared to *Trim21*<sup>+/+</sup> values at 0 h (+/+ columns and -/- columns) or ratio between *Trim21*<sup>+/+</sup> and *Trim21*<sup>-/-</sup> at the same time point (ratio columns). Positive values indicate up-regulation while negative values demonstrate downregulation. *Ifnar1* and *Ifnar2* indicate that there is no difference in type I IFN receptor expression between *Trim21*<sup>+/+</sup> and *Trim21*<sup>-/-</sup> EFs. *Gusb*, *Hprt1*, *Hsp90ab1*, *Gapdh* and *Actb* were used as controls. Values are the means of two independent experiments. *B*, *Trim21*<sup>+/+</sup> and *Trim21*<sup>-/-</sup> unprimed BMMs were stimulated with IFN- $\gamma$ , and mRNA of type II IFN-inducible genes was quantified by PCR Array. *Ifngr1* and *Ifngr2* indicate that there is no difference in type II IFN receptor expression between *Trim21*<sup>+/+</sup> and *Trim21*<sup>-/-</sup> BMMs.



SUPPLEMENTAL TABLE I. Frequency of cell populations in lymphoid organs of *Trim21*<sup>+/+</sup> and *Trim21*<sup>-/-</sup> mice

| Tissue      | Subset                              | Surface marker                                                           | Cell frequency (%) <sup>a</sup> |      |                              |      |
|-------------|-------------------------------------|--------------------------------------------------------------------------|---------------------------------|------|------------------------------|------|
|             |                                     |                                                                          | <i>Trim21</i> <sup>+/+</sup>    |      | <i>Trim21</i> <sup>-/-</sup> |      |
| Thymus      | Double-negative thymocyte           | CD4 <sup>-</sup> CD8 <sup>-</sup>                                        | 7.91 ±                          | 0.35 | 9.30 ±                       | 0.56 |
|             | Double-positive thymocyte           | CD4 <sup>+</sup> CD8 <sup>+</sup>                                        | 62.10 ±                         | 2.01 | 60.98 ±                      | 2.35 |
|             | CD4 <sup>+</sup> thymocyte          | CD4 <sup>+</sup> CD8 <sup>-</sup>                                        | 26.98 ±                         | 1.99 | 26.20 ±                      | 2.49 |
|             | CD8 <sup>+</sup> thymocyte          | CD4 <sup>-</sup> CD8 <sup>+</sup>                                        | 3.02 ±                          | 0.28 | 3.55 ±                       | 0.27 |
| Bone marrow | Early pro-B cell                    | B220 <sup>low</sup> IgM <sup>-</sup> CD43 <sup>+</sup> CD24 <sup>-</sup> | 3.72 ±                          | 0.09 | 3.20 ±                       | 0.20 |
|             | Late pro-B/large pre-B cell         | B220 <sup>low</sup> IgM <sup>-</sup> CD43 <sup>+</sup> CD24 <sup>+</sup> | 4.45 ±                          | 0.44 | 4.10 ±                       | 0.47 |
|             | Small pre-B cell                    | B220 <sup>low</sup> IgM <sup>-</sup> CD43 <sup>-</sup> CD24 <sup>+</sup> | 22.01 ±                         | 1.56 | 22.68 ±                      | 0.49 |
|             | Immature B cell                     | B220 <sup>low</sup> IgM <sup>+</sup>                                     | 13.07 ±                         | 0.88 | 15.56 ±                      | 0.82 |
|             | Mature B cell                       | B220 <sup>high</sup> IgM <sup>+</sup>                                    | 14.97 ±                         | 2.10 | 15.73 ±                      | 1.27 |
| Spleen      | B cell                              | CD19 <sup>+</sup> B220 <sup>+</sup>                                      | 34.20 ±                         | 3.06 | 42.35 ±                      | 2.35 |
|             | B-1a B cell                         | CD19 <sup>+</sup> CD5 <sup>+</sup>                                       | 3.03 ±                          | 0.35 | 2.82 ±                       | 0.19 |
|             | Plasma cell                         | CD138 <sup>+</sup>                                                       | 1.51 ±                          | 0.14 | 1.25 ±                       | 0.14 |
|             | CD4 <sup>+</sup> T cell             | CD3 <sup>+</sup> CD4 <sup>+</sup> CD8 <sup>-</sup>                       | 25.64 ±                         | 1.32 | 22.73 ±                      | 1.53 |
|             | CD8 <sup>+</sup> T cell             | CD3 <sup>+</sup> CD4 <sup>-</sup> CD8 <sup>+</sup>                       | 15.13 ±                         | 1.65 | 12.12 ±                      | 1.40 |
|             | CD25 <sup>+</sup> regulatory T cell | CD4 <sup>+</sup> CD25 <sup>+</sup>                                       | 2.19 ±                          | 0.24 | 2.15 ±                       | 0.07 |
|             | Natural killer cell                 | NK-1.1 <sup>+</sup> CD3 <sup>-</sup>                                     | 3.77 ±                          | 0.18 | 4.31 ±                       | 0.42 |
|             | Macrophage                          | CD11b <sup>+</sup> F4/80 <sup>+</sup>                                    | 2.80 ±                          | 0.40 | 2.79 ±                       | 0.92 |
|             | Granulocyte                         | CD11b <sup>+</sup> F4/80 <sup>-</sup> Gr-1 <sup>high</sup>               | 0.68 ±                          | 0.12 | 0.52 ±                       | 0.11 |
|             | Conventional dendritic cell         | CD11c <sup>+</sup> B220 <sup>-</sup> CD19 <sup>-</sup>                   | 3.14 ±                          | 0.28 | 3.19 ±                       | 0.36 |
|             | Plasmacytoid dendritic cell         | CD11c <sup>+</sup> B220 <sup>+</sup> CD19 <sup>-</sup>                   | 0.94 ±                          | 0.06 | 0.95 ±                       | 0.10 |
| Lymph node  | B cell                              | CD19 <sup>+</sup> B220 <sup>+</sup>                                      | 18.33 ±                         | 1.01 | 20.28 ±                      | 3.74 |
|             | Plasma cell                         | CD138 <sup>+</sup>                                                       | 0.78 ±                          | 0.12 | 0.60 ±                       | 0.13 |
|             | CD4 <sup>+</sup> T cell             | CD3 <sup>+</sup> CD4 <sup>+</sup> CD8 <sup>-</sup>                       | 33.32 ±                         | 2.80 | 35.77 ±                      | 2.39 |
|             | CD8 <sup>+</sup> T cell             | CD3 <sup>+</sup> CD4 <sup>-</sup> CD8 <sup>+</sup>                       | 20.44 ±                         | 1.16 | 18.54 ±                      | 2.43 |
|             | CD25 <sup>+</sup> regulatory T cell | CD4 <sup>+</sup> CD25 <sup>+</sup>                                       | 3.63 ±                          | 0.32 | 4.01 ±                       | 0.12 |
|             | Natural killer cell                 | NK-1.1 <sup>+</sup> CD3 <sup>-</sup>                                     | 1.16 ±                          | 0.13 | 1.38 ±                       | 0.16 |
|             | Macrophage                          | CD11b <sup>+</sup> F4/80 <sup>+</sup>                                    | 0.91 ±                          | 0.12 | 0.72 ±                       | 0.06 |
|             | Granulocyte                         | CD11b <sup>+</sup> F4/80 <sup>-</sup> Gr-1 <sup>high</sup>               | 0.03 ±                          | 0.01 | 0.02 ±                       | 0.01 |
|             | Conventional dendritic cell         | CD11c <sup>+</sup> B220 <sup>-</sup> CD19 <sup>-</sup>                   | 1.43 ±                          | 0.22 | 1.15 ±                       | 0.22 |
|             | Plasmacytoid dendritic cell         | CD11c <sup>+</sup> B220 <sup>+</sup> CD19 <sup>-</sup>                   | 0.39 ±                          | 0.07 | 0.35 ±                       | 0.08 |

<sup>a</sup> Mean percentage ± SEM is given for groups of 2 to 4 mice analyzed.
